# Supplementary material for: Genome Comparison and Phylogenetic Analysis of Orientia tsutsugamushi Strains
Source: PubMed Central journal article supplement — DNA Res. 2010 Aug 3;17(5):281–91. doi: 10.1093/dnares/dsq018 (PMC2955711; doi:10.1093/dnares/dsq018), 2010-08-03

## Legends of Supplementary Figures

**Supplementary Fig. S1** Duplicated strain-specific sequences of strains Ikeda and Boryong.

Genetic organizations of duplicated strain-specific sequences and their flanking regions are shown. Green, yellow and pink boxes indicate the OtAGEs, transposable elements (IS, MITE or Group II intron) and short repeats, respectively.

**Supplementary Fig. S2** Repetitive sequence-mediated gene duplication in strain Boryong.

Genetic organizations of the Boryong genomic regions that were duplicated by repetitive sequences are shown: the regions corresponding to the OTT\_0164 locus of strain Ikeda (a), those corresponding to the OTT\_0440 locus (b), and those corresponding to the OTT\_0622 locus (c). Green, yellow and gray boxes indicate the OtAGEs, transposable elements (IS, MITE or Group II intron) and short repeats, respectively. Homologous regions are indicated by light-green shading.

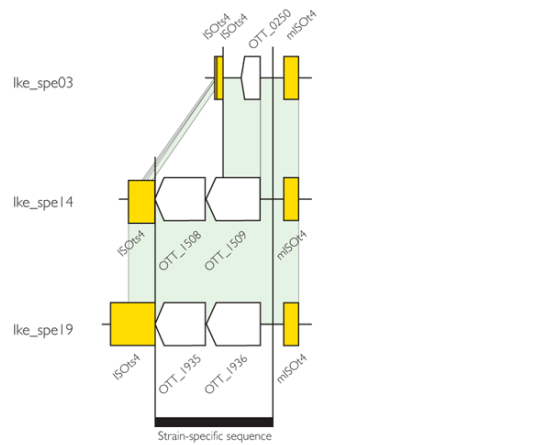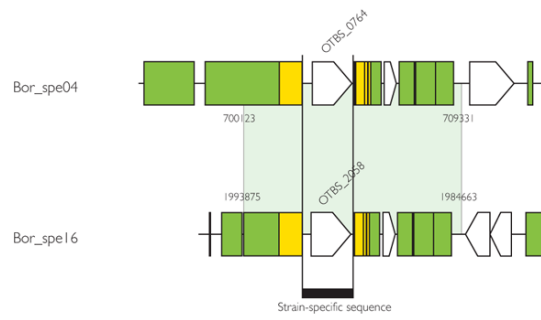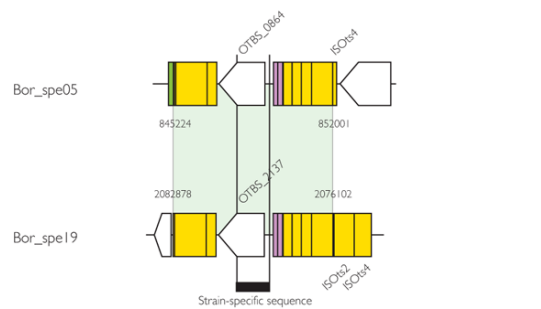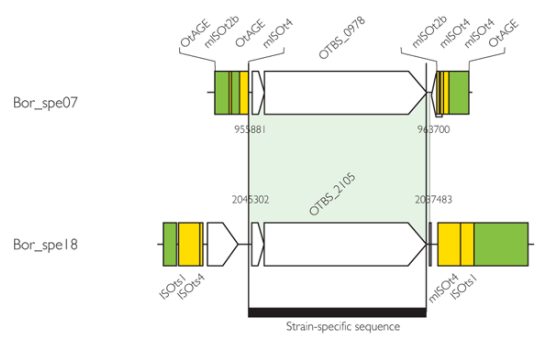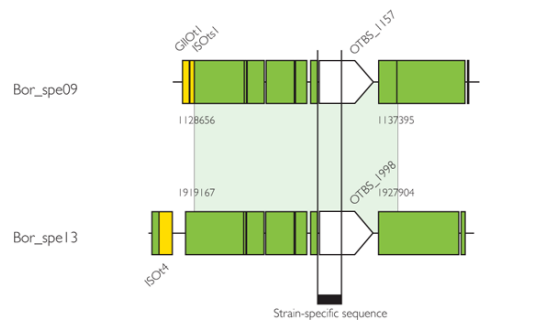

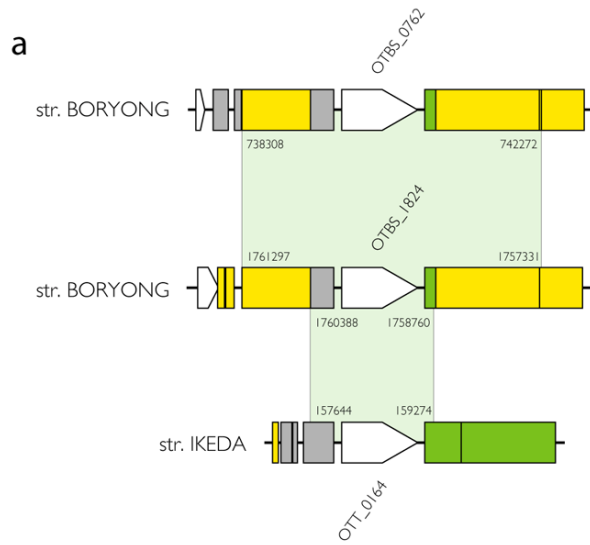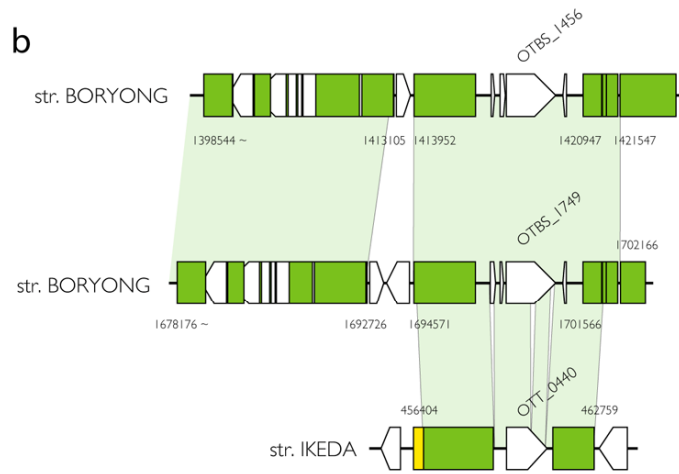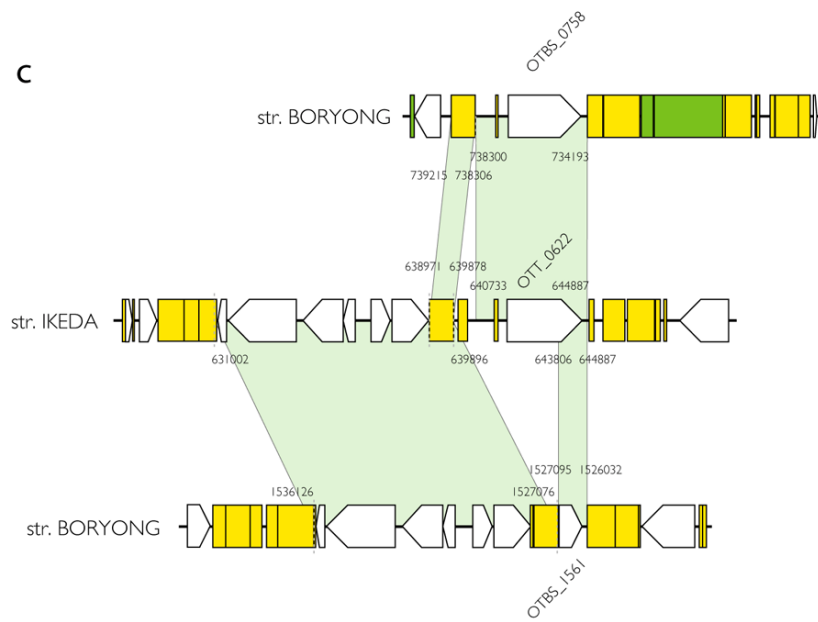

Supplement: supp_dsq018_dsq018supp.pdf [file supp_dsq018_dsq018supp.pdf]
